# Supplementary material for: A multivariate metal–organic framework based pH-responsive dual-drug delivery system for chemotherapy and chemodynamic therapy
Source: Royal Society of Chemistry journal article supplement (doi:10.1039/d3ma00389b), 2023-01-01
Supplement: d3ma00389b1.pdf [file d3ma00389b1.pdf]

## Supporting Information

### Multivariate Metal-Organic Frameworks based pH-responsive dual-drug delivery system for chemotherapy and chemodynamic therapy

Muhammad Usman Akbar<sup>a,b</sup>, Arslan Akbar<sup>b</sup>, Umair Ali Khan Saddozai<sup>c</sup>, Malik Ihsan Ullah Khan<sup>d</sup>, Muhammad Zaheer<sup>b,\*</sup> and Muhammad Badar<sup>a,\*</sup>

<sup>a</sup>Gomal Center of Biochemistry and Biotechnology, Gomal University, Dera Ismail Khan, 29050, Pakistan

<sup>b</sup>Department of Chemistry and Chemical Engineering, Syed Babar Ali School of Science and Engineering, Lahore University of Management Sciences (LUMS), Lahore, 54792, Pakistan

<sup>c</sup>Department of Preventive Medicine, Institute of Biomedical Informatics, Bioinformatics Center, Henan Provincial Engineering Center for Tumor Molecular Medicine, School of Basic Medical Sciences, Henan University, Kaifeng 475004, China

<sup>d</sup>Institute of Molecular Biology and Biotechnology, The University of Lahore, Lahore, 54000, Pakistan

**Corresponding author(s):** muhammad.zaheer@lums.edu.pk (M.Z), mbadar@gu.edu.pk (M.B)

#### Contents

|                                                                                                     |                   |
|-----------------------------------------------------------------------------------------------------|-------------------|
| SEM images, EDX spectra, and elemental map of FeCo-cluster.....                                     | <b>Figure S1</b>  |
| PXRD pattern, and FT-IR spectra of FeCo-cluster.....                                                | <b>Figure S2</b>  |
| The metal composition of FeCo-cluster and MTV-1 MOFs obtained by EDX and ICP-OES .....              | <b>Table S1</b>   |
| N <sub>2</sub> adsorption-desorption isotherm of FeCo-MIL-88B, MTV-1, and FeCo-MIL-88D..            | <b>Figure S3</b>  |
| Calibration curve of 5-FU in ethanol.....                                                           | <b>Figure S4</b>  |
| Calibration curve of CUR in ethanol.....                                                            | <b>Figure S5</b>  |
| Calibration curve of 5-FU in PBS.....                                                               | <b>Figure S6</b>  |
| Drug loading capacity of different MOFs for 5-FU and CUR.....                                       | <b>Table S2</b>   |
| The IR peaks of 5-Fluorouracil and Curcumin spectrum.....                                           | <b>Table S3</b>   |
| Calibration curve of CUR in PBS.....                                                                | <b>Figure S7</b>  |
| Application of 5-FU release data on mathematical models for MTV-1@5-FU+CUR at pH = 5.5 and 7.4..... | <b>Figure S8</b>  |
| Application of CUR release data on mathematical models for MTV-1@5-FU+CUR at pH = 5.5 and 7.4.....  | <b>Figure S9</b>  |
| Kinetic release models with their mathematical formulas.....                                        | <b>Table S4</b>   |
| Colony formation assay results of HepG2 cells treated with 5-FU, CUR, MTV-1 and MTV-1@5-FU+CUR      | <b>Figure S10</b> |
| Fe ion and Co ion release from MTV-1 in PBS (pH = 5.5 and 7.4).....                                 | <b>Figure S11</b> |

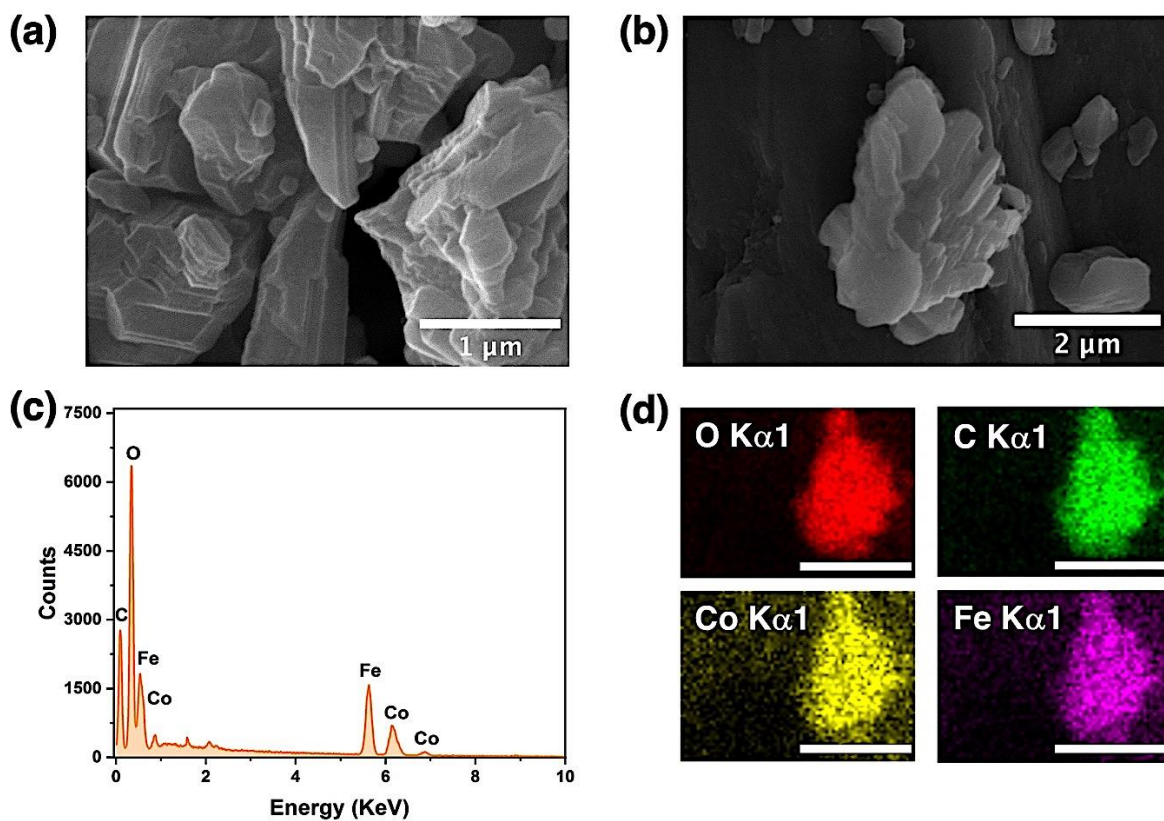

**Figure S1.** SEM images (a-b), EDX spectra (b), and elemental map (c) of FeCo-cluster

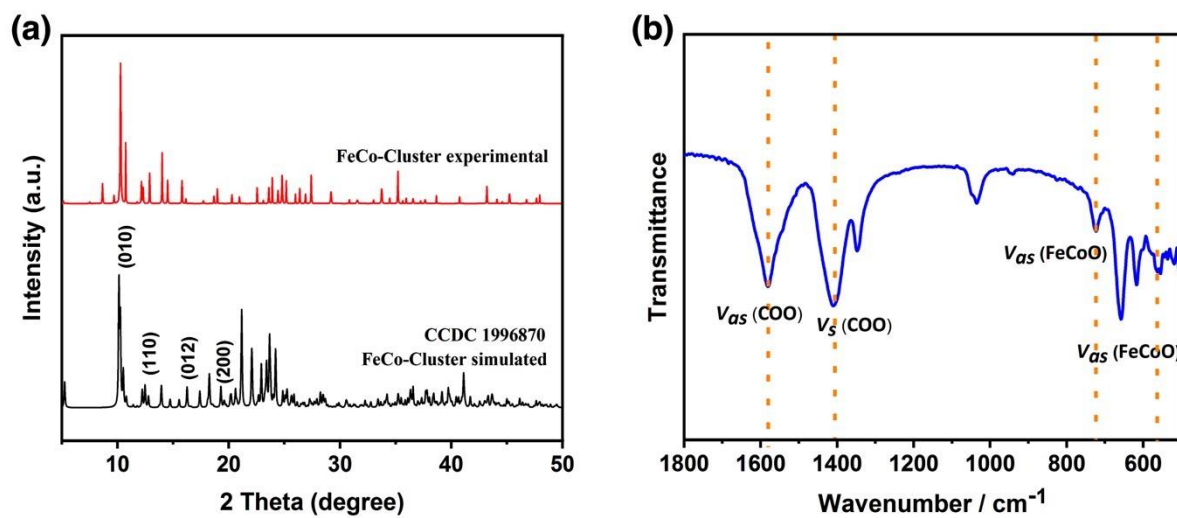

**Figure S2.** PXRD pattern (a), and FT-IR spectra (b) of FeCo-cluster

**Table S1.** The metal composition of FeCo-cluster and MTV-1 MOFs obtained by EDX and ICP-OES

| Sample       | OES                  |                          |
|--------------|----------------------|--------------------------|
|              | EDX<br>n(Fe) : n(Co) | ICP-OES<br>n(Fe) : n(Co) |
| FeCo-Cluster | 2.02 : 1             | 1.88 : 1                 |
| MTV-1        | 1.94 : 1             | 1.83 : 1                 |

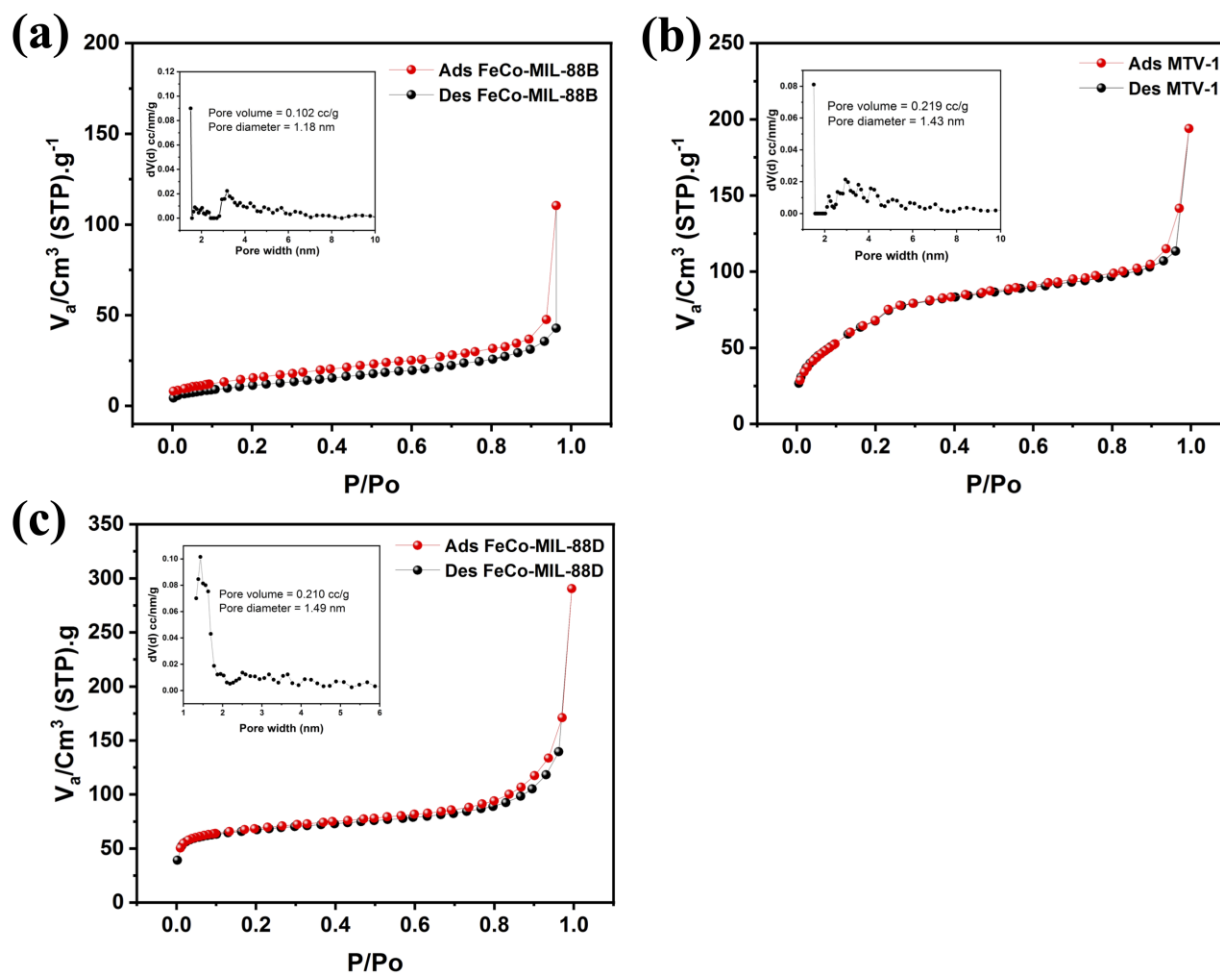

**Figure S3.**  $N_2$  adsorption-desorption isotherm of FeCo-MIL-88B (a), MTV-1 (b), and FeCo-MIL-88D (c) with insets = pore dynamics.

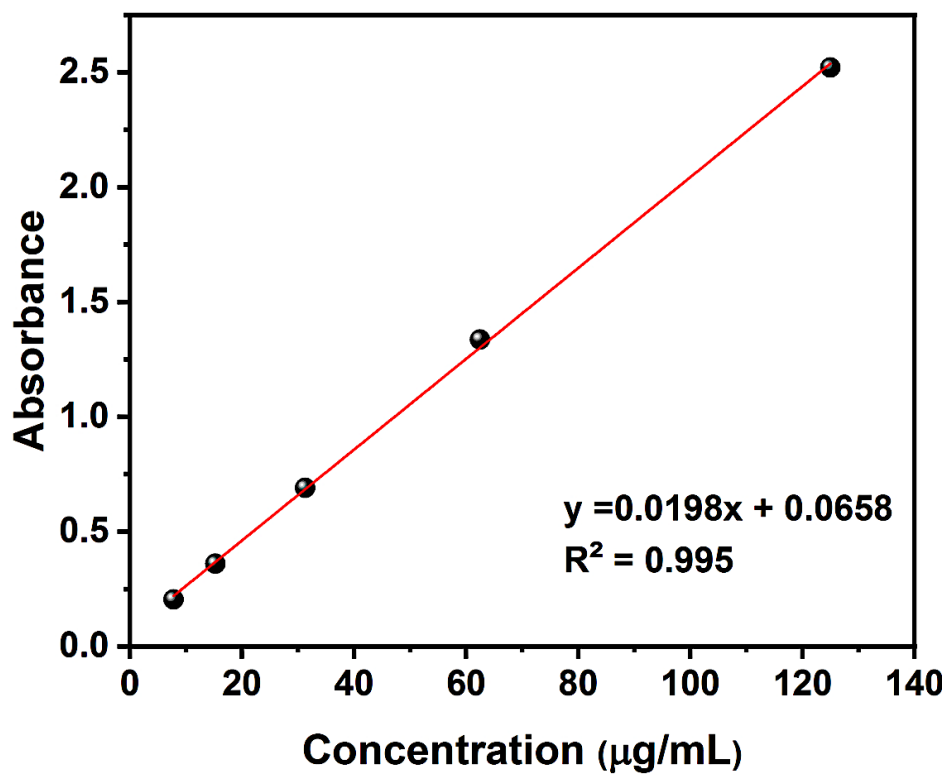

Figure S4. Calibration curve of 5-FU in ethanol

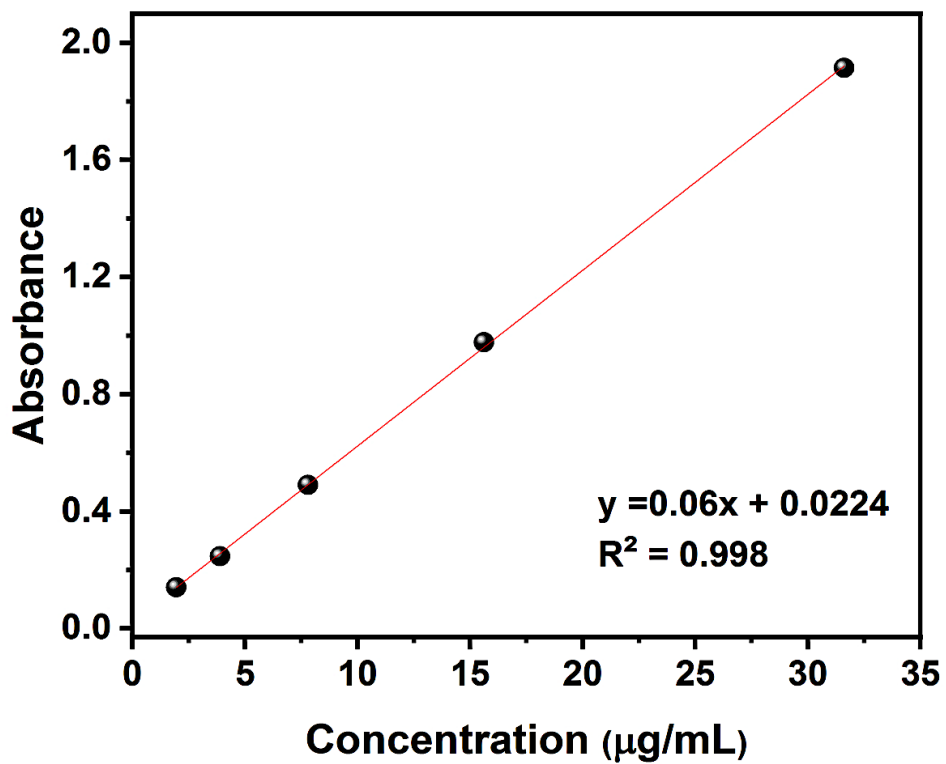

Figure S5. Calibration curve of CUR in ethanol

**Table S2.** Drug loading capacity of different MOFs for 5-FU and CUR

| Type of MOF  | 5-FU loading (wt%) | CUR loading (wt%) |
|--------------|--------------------|-------------------|
| FeCo-MIL-88B | 22.6               | 0.5               |
| FeCo-MIL-88D | 19.7               | 3.5               |
| MTV-1        | 15.1               | 9.3               |

**Table S3.** The IR peaks of 5-Fluorouracil and Curcumin spectrum

| Wavenumber (cm <sup>-1</sup> ) | Functional groups             |
|--------------------------------|-------------------------------|
| <b>5-FU</b>                    |                               |
| 740                            | CF = CH group vibrations      |
| 800                            | C-F wagging band              |
| 1240                           | C-N vibrational band          |
| 1710                           | C = O carbonyl stretching     |
| <b>CUR</b>                     |                               |
| 974                            | C = C benzene ring stretching |
| 1278                           | C-O aromatic stretching       |
| 1594                           | C-O-C stretching              |
| 3200-3500                      | stretching band in enol form  |

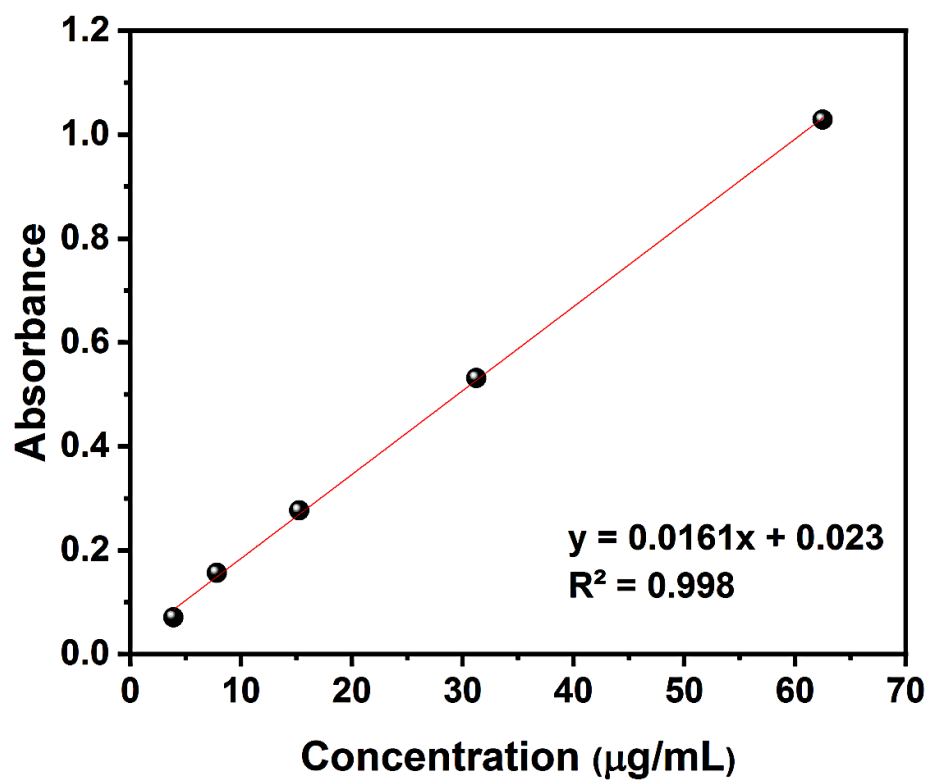

Figure S6. Calibration curve of 5-FU in PBS

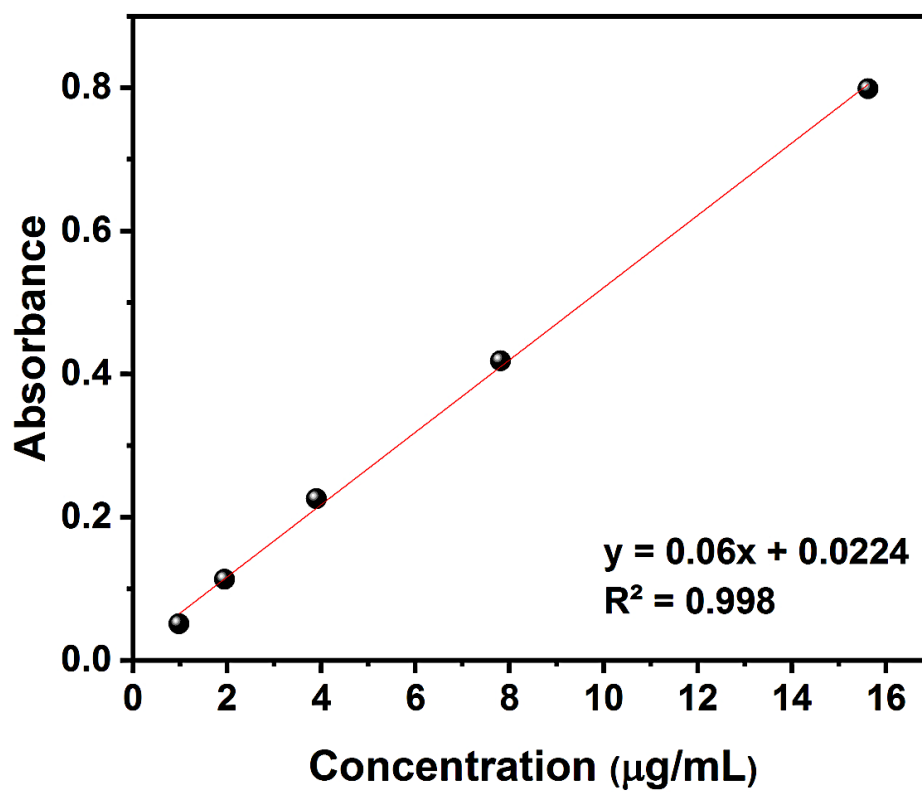

Figure S7. Calibration curve of CUR in PBS

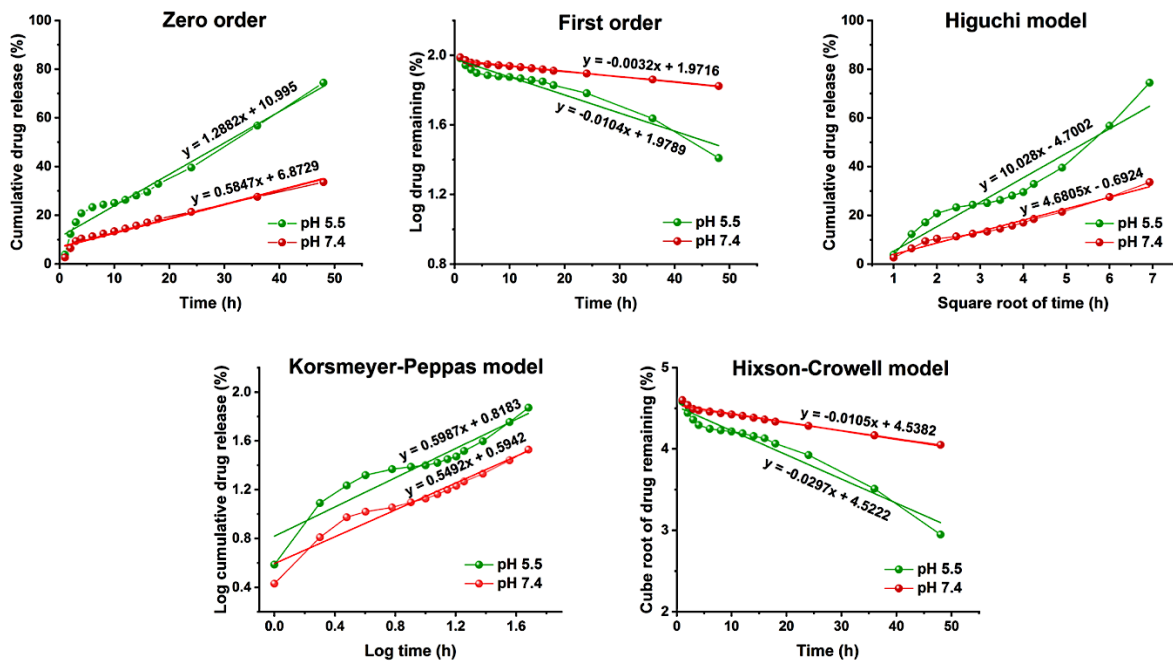

**Figure S8.** Application of 5-FU release data on mathematical release models for MTV-1@5-FU+CUR at pH = 5.5 and 7.4

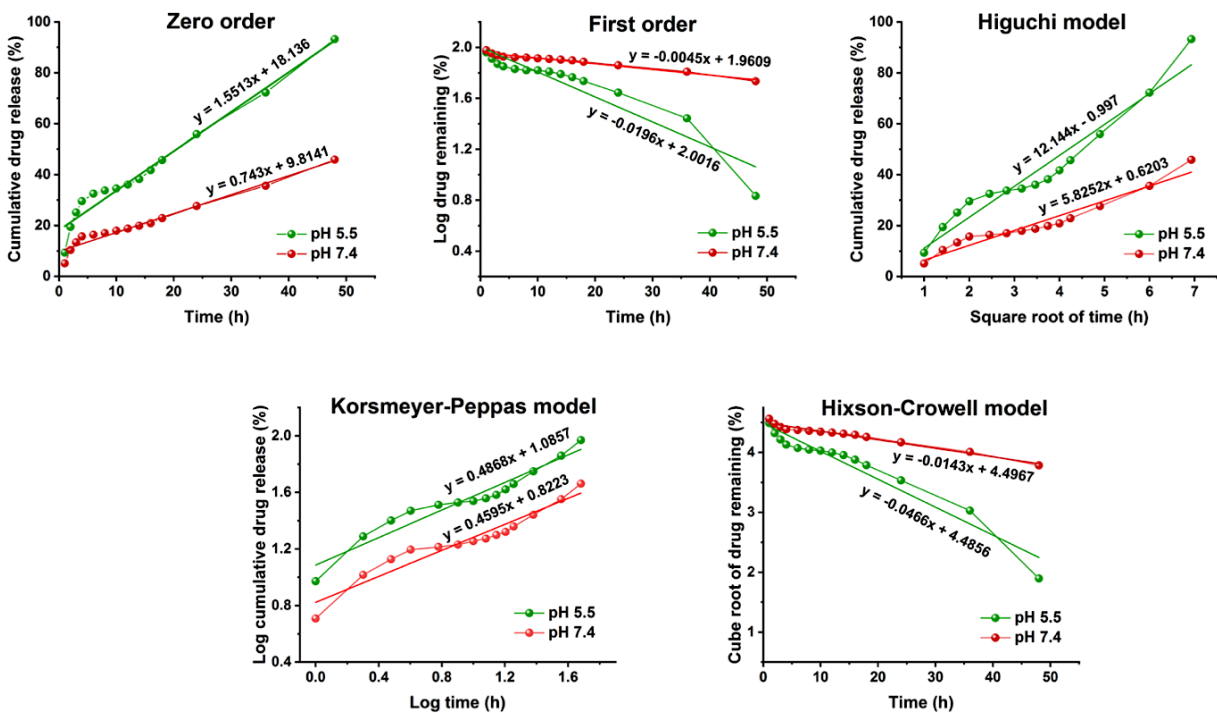

**Figure S9.** Application of CUR release data on mathematical release models for MTV-1@5-FU+CUR at pH = 5.5 and 7.4

**Table S4.** Kinetic release models with their mathematical formulas

| Kinetic model    | Formula                                             |
|------------------|-----------------------------------------------------|
| Zero order       | $M_0 - M_t = K_0 t$                                 |
| First order      | $M_t = M_0 \cdot \exp^{-k_1 t}$                     |
| Higuchi          | $M_t = k_t^{1/2}$                                   |
| Korsmeyer-Peppas | $M_t/M_\infty = k_{KP} \cdot t^n$                   |
| Hixson-Crowell   | $1 - [1 - M_t/M_\infty]^{1/3} = 1 - K_{HC} \cdot t$ |

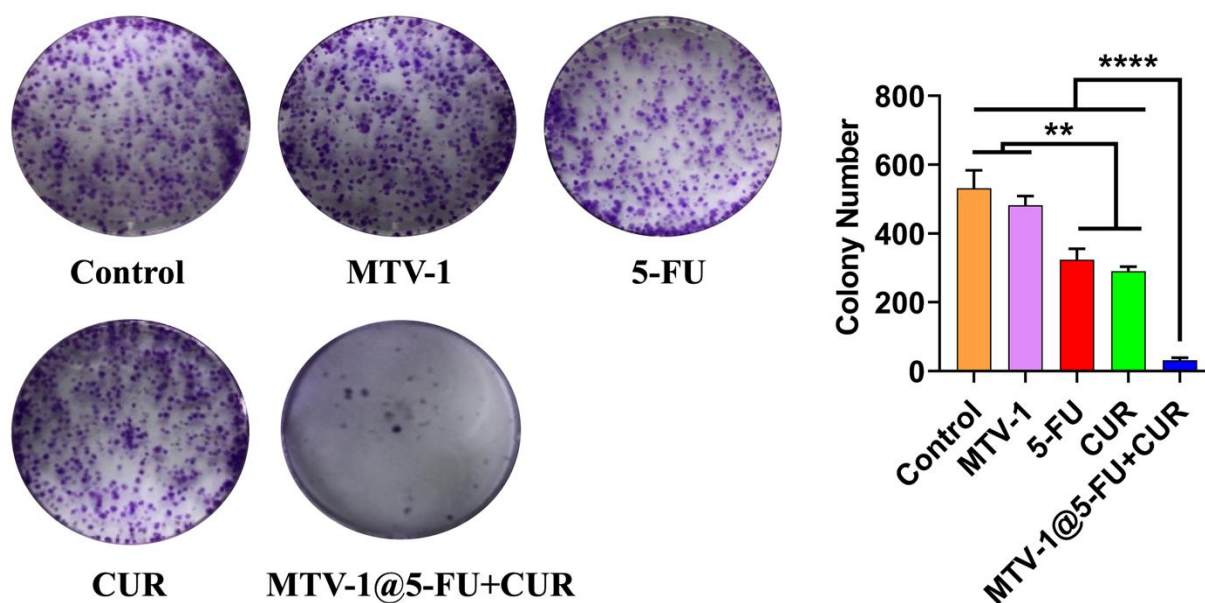

**Figure S10.** Colony formation assay results of HepG2 cells treated with 5-FU, CUR, MTV-1 and MTV-1@5-FU+CUR. Data are means  $\pm$  SD. (n=3); \*\*P $\leq$  0.01 and \*\*\*\*P $\leq$  0.0001 compared with control.



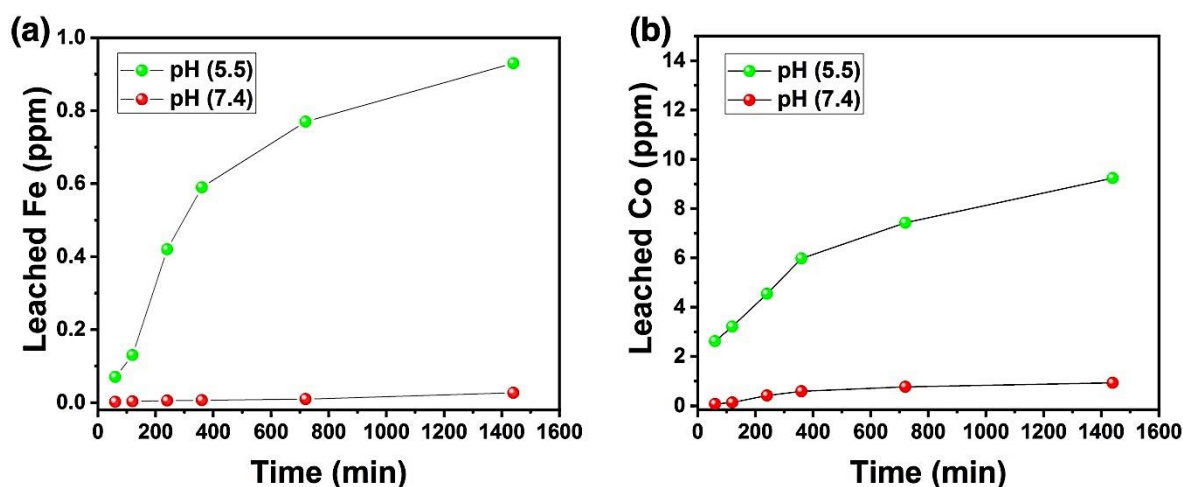

**Figure S11.** Fe ion release (a), and Co ion release (b) from MTV-1 in PBS (pH = 5.5 and 7.4)

**Table S5.** List of reported MOFs for multi-drug delivery.

| MOFs                  | Loaded Drugs       | Stimuli               | Cell lines                     | Therapy       | References |
|-----------------------|--------------------|-----------------------|--------------------------------|---------------|------------|
| UiO-67                | 5-FU + PMT         | pH                    | A549, HeLa Cells               | CT            | 1          |
| ZIF-8                 | DOX + CPT          | pH<br>NIR laser       | HepG2 cells                    | CT and<br>PTT | 2          |
| ZIF-90                | DOX + 5-FU         | pH                    | -                              | -             | 3          |
| ZIF-8                 | DOX + VER          | pH                    | MCF-7                          | CT            | 4          |
| Mixed ligand<br>MOFs  | IBU + DOX          | pH                    | HEK-293A                       | -             | 5          |
| MTV MOFs              | DOX + IBU +<br>RhB | Linker<br>interaction | -                              | -             | 6          |
| Zr-MOFs               | 5-FU + DCA         | -                     | MCF-7                          | CT            | 7          |
| ZIF-8                 | DOX + HCPT         | pH                    | HepG2, HeLa and<br>MCF-7 cells | CT and<br>PTT | 8          |
| MIL-88B-on-<br>UiO-66 | 5-FU + AL          | -                     | MCF-7                          | CT            | 9          |
| MOF-74                | IBU + CUR          | -                     | -                              | -             | 10         |
| Core-Shell<br>MOFs    | DOX + CUR          | pH                    | MCF-7 and HepG2                | CT            | 11         |
| Al-MOF/GO             | 5-FU + DOX         | pH                    | MCF-7 and MCF-<br>10a          | CT            | 12         |

|          |            |    |                      |               |           |
|----------|------------|----|----------------------|---------------|-----------|
| MTV MOFs | 5-FU + CUR | pH | HEK-293 and<br>HepG2 | CT and<br>CDT | This work |
|----------|------------|----|----------------------|---------------|-----------|

## ABBREVIATIONS

|         |                                   |
|---------|-----------------------------------|
| CDT     | Chemodynamic therapy              |
| CT      | Chemotherapy                      |
| CUR     | Curcumin                          |
| DOX     | Doxorubicin                       |
| GO      | Graphene Oxide                    |
| HCPT    | 10-Hydroxycamptothecin            |
| HEK-293 | Human Embryonic Kidney cells      |
| HepG2   | Human Hepatocellular cancer cells |
| IBU     | Ibuprofen                         |
| MCF     | Michigan Cancer Foundation        |
| MTV     | Multivariate                      |
| NIR     | Near Infrared                     |
| PMT     | Pemetrexed                        |
| PTT     | Photothermal Therapy              |
| RhB     | Rhodamine B                       |
| UiO     | University of Oslo                |
| VER     | Verapamil                         |
| ZIF     | Zeolite Imidazolate Framework     |

1. Liu, W.; Pan, Y.; Zhong, Y.; Li, B.; Ding, Q.; Xu, H.; Qiu, Y.; Ren, F.; Li, B.; Muddassir, M., A multifunctional aminated UiO-67 metal-organic framework for enhancing antitumor cytotoxicity through bimodal drug delivery. *Chemical Engineering Journal* **2021**, *412*, 127899.
2. Yang, J.-C.; Chen, Y.; Li, Y.-H.; Yin, X.-B., Magnetic resonance imaging-guided multi-drug chemotherapy and photothermal synergistic therapy with pH and NIR-stimulation release. *ACS applied materials & interfaces* **2017**, *9* (27), 22278-22288.
3. Zhang, F.-M.; Dong, H.; Zhang, X.; Sun, X.-J.; Liu, M.; Yang, D.-D.; Liu, X.; Wei, J.-Z., Postsynthetic modification of ZIF-90 for potential targeted codelivery of two anticancer drugs. *ACS applied materials & interfaces* **2017**, *9* (32), 27332-27337.
4. Zhang, H.; Jiang, W.; Liu, R.; Zhang, J.; Zhang, D.; Li, Z.; Luan, Y., Rational design of metal organic framework nanocarrier-based codelivery system of doxorubicin hydrochloride/verapamil hydrochloride for overcoming multidrug resistance with efficient targeted cancer therapy. *ACS Applied Materials & Interfaces* **2017**, *9* (23), 19687-19697.

5. Sun, K.; Li, L.; Yu, X.; Liu, L.; Meng, Q.; Wang, F.; Zhang, R., Functionalization of mixed ligand metal-organic frameworks as the transport vehicles for drugs. *Journal of colloid and interface science* **2017**, *486*, 128-135.
6. Dong, Z.; Sun, Y.; Chu, J.; Zhang, X.; Deng, H., Multivariate metal-organic frameworks for dialing-in the binding and programming the release of drug molecules. *Journal of the American Chemical Society* **2017**, *139* (40), 14209-14216.
7. Lázaro, I. A.; Lázaro, S. A.; Forgan, R. S., Enhancing anticancer cytotoxicity through bimodal drug delivery from ultrasmall Zr MOF nanoparticles. *Chemical communications* **2018**, *54* (22), 2792-2795.
8. Li, S.; Zhang, L.; Liang, X.; Wang, T.; Chen, X.; Liu, C.; Li, L.; Wang, C., Tailored synthesis of hollow MOF/polydopamine Janus nanoparticles for synergistic multi-drug chemophotothermal therapy. *Chemical Engineering Journal* **2019**, *378*, 122175.
9. Wang, X. G.; Xu, L.; Li, M. J.; Zhang, X. Z., Construction of flexible-on-rigid hybrid-phase metal-organic frameworks for controllable multi-drug delivery. *Angewandte Chemie International Edition* **2020**, *59* (41), 18078-18086.
10. Lawson, S.; Rownaghi, A. A.; Rezaei, F., Combined ibuprofen and curcumin delivery using Mg-Mof-74 as a single nanocarrier. *ACS Applied Bio Materials* **2021**, *5* (1), 265-271.
11. Jalaladdiny, S.-s.; Badoei-dalfard, A.; Karami, Z.; Sargazi, G., Co-delivery of doxorubicin and curcumin to breast cancer cells by a targeted delivery system based on Ni/Ta core-shell metal-organic framework coated with folic acid-activated chitosan nanoparticles. *Journal of the Iranian Chemical Society* **2022**, *19* (10), 4287-4298.
12. Asl, E. A.; Pooresmaeil, M.; Namazi, H., Chitosan coated MOF/GO nanohybrid as a co-anticancer drug delivery vehicle: Synthesis, characterization, and drug delivery application. *Materials Chemistry and Physics* **2023**, *293*, 126933.
